# Supplementary material for: What controls open-pore and residual currents in the first sensing zone of alpha-hemolysin nanopore? Combined experimental and theoretical study
Source: Royal Society of Chemistry journal article supplement (doi:10.1039/c6nr00164e), 2016-01-01
Supplement: c6nr00164e1.pdf [file c6nr00164e1.pdf]

### SUPPLEMENTARY INFORMATION FOR

What controls open-pore and residual currents in the first sensing zone of alpha-hemolysin nanopore? Combined experimental and theoretical study

Pablo M. De Biase<sup>1\*</sup>, Eric N. Ervin<sup>2\*</sup>, Prithwish Pal<sup>2‡</sup>, Olga Samoylova<sup>1‡</sup>, Suren Markosyan<sup>1‡</sup>, Michael G. Keehan<sup>2‡</sup>,  
Geoffrey A. Barrall<sup>2</sup> and Sergei Yu. Noskov<sup>1</sup>

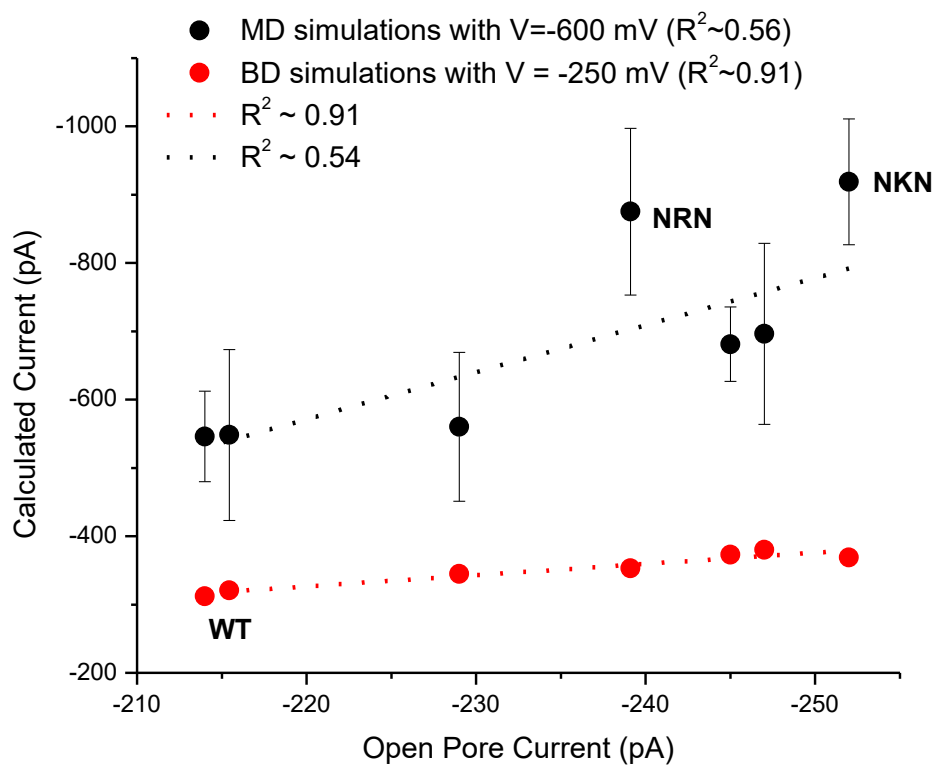

**Figure S1.** Calculated vs. Measured open pore current. The error-bars for BD data did not exceed 5 %.

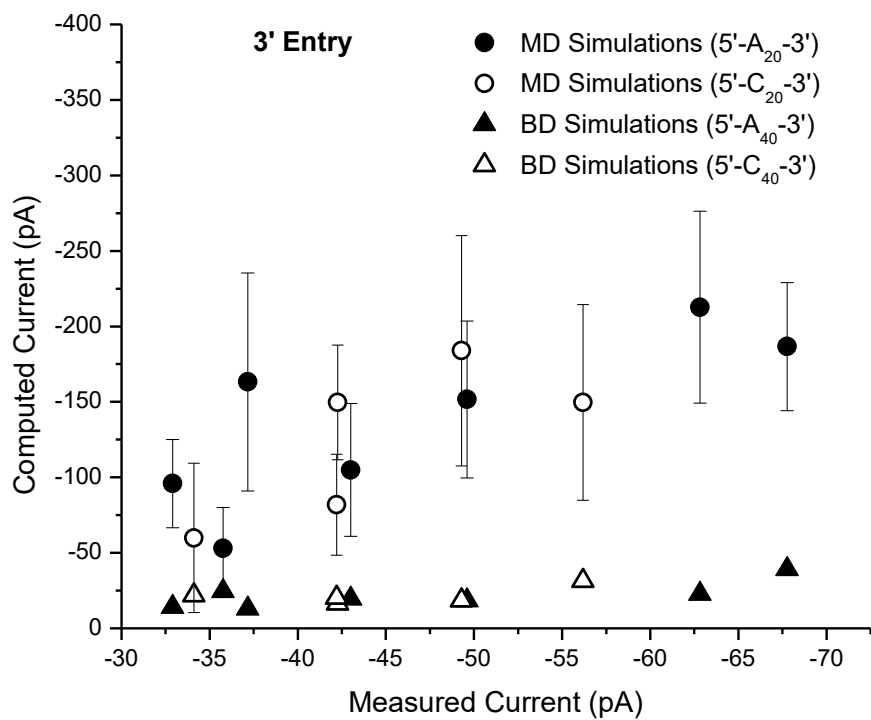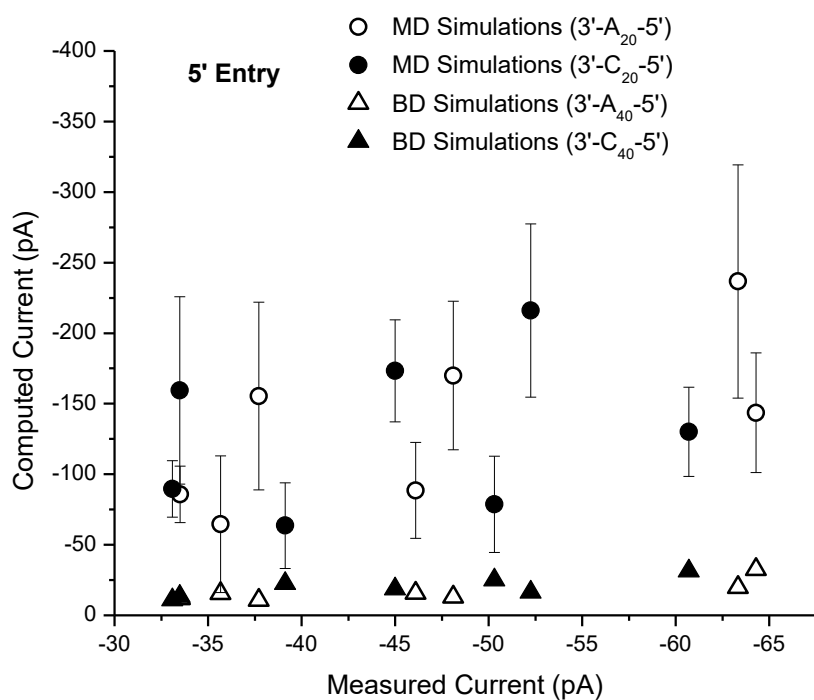

**Figure S2.** The computed vs. measured currents in all studied systems for 3' and 5' entrance. The error bars are not shown for BD simulations (within 2 % of the computed average values).

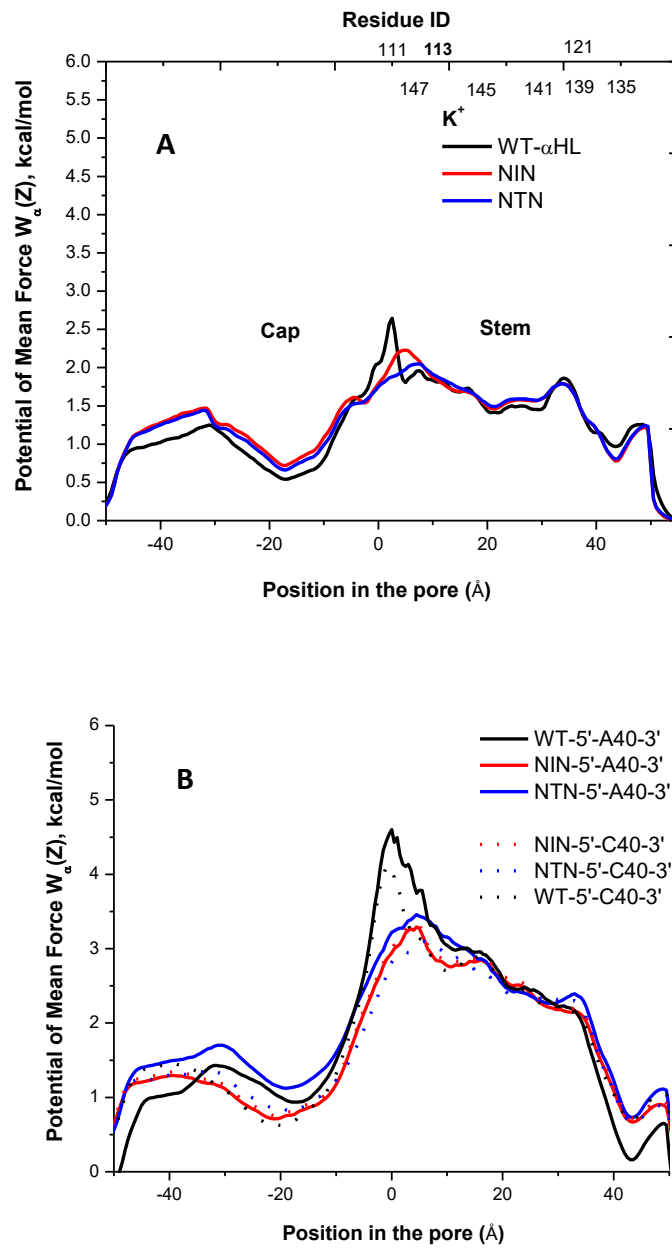

**Figure S3.** 1D multi-ion average PMF averaged from ten micro-second simulations per system for open (A) and block pores (B). The results are shown for the  $K^+$  ions only.
